# Supplementary material for: Practice Elements Used With Depressed Clients by Community Mental Health Therapists
Source: Atypon-hosted journal article supplement (doi:10.1176/appi.ps.201500055), 2015-09-01
Supplement: appi.ps.201500055.ds001.pdf [file appi.ps.201500055.ds001.pdf]

Table 1

*Therapist Self-Reported EBPI Preferences*

| Item  | Familiarity |           | Fit with Client |           |
|-------|-------------|-----------|-----------------|-----------|
|       | <i>M</i>    | <i>SD</i> | <i>M</i>        | <i>SD</i> |
| CBT   | 3.52        | 0.81      | 3.70            | 0.89      |
| MBCBT | 2.84        | 1.02      | 3.39            | 1.00      |
| PST   | 2.83        | 1.05      | 3.36            | 0.93      |
| IPT   | 2.67        | 1.08      | 3.09            | 0.98      |
| BPT   | 2.65        | 1.05      | 2.77            | 1.02      |
| BA    | 2.44        | 1.07      | 3.13            | 1.02      |
| SCT   | 2.22        | 1.13      | 2.90            | 1.06      |
| ACT   | 2.06        | 1.03      | 2.80            | 0.96      |

*Note.* CBT = Cognitive Behavior Therapy. MBCBT = Mindfulness Based Cognitive Behavioral Therapy. PST = Problem Solving Therapy. IPT = Interpersonal Therapy. BPT = Brief Psychodynamic Therapy. SCT = Self-Control Therapy. BA = Behavioral Activation. ACT = Acceptance and Commitment Therapy. Higher mean score indicates greater familiarity and perceived client fit on a scale of 1 to 5, specifically, therapists responded to the prompt “Please rate which practice level reflects your current experience with each of the following evidence based psychosocial interventions (EBPIs) using the following scale.” The scale numbers were defined to reflect: *1=Unfamiliar:* You have had no formal exposure and have not used this EBPI; *2=Novice:* You have had some exposure, but you are not yet comfortable using this EBPI with clients; *3=Intermediate:* You use this EBPI with clients, but you could use a refresher; *4=Advanced:* You feel comfortable using this EBPI with clients; *5=Expert:* You not only use this EBPI with clients, but you would feel comfortable supervising others in this approach.

Table 2

*Therapist Report of Practice Element Use*

| Most Frequently Endorsed Practice Elements                     | Therapists<br><i>N</i> | Therapists<br>Percentage |
|----------------------------------------------------------------|------------------------|--------------------------|
| Cognitive Restructuring                                        | 137                    | 83.0%                    |
| Problem Solving                                                | 125                    | 75.8%                    |
| Goal Setting                                                   | 122                    | 73.9%                    |
| Psychoeducation                                                | 120                    | 72.7%                    |
| Relaxation                                                     | 111                    | 67.3%                    |
| Substituting with Positive Thoughts                            | 105                    | 63.6%                    |
| Self-monitoring (mood, thoughts)                               | 98                     | 59.4%                    |
| Assertiveness Training                                         | 95                     | 57.6%                    |
| Advantages/Disadvantages (Pros/Cons)                           | 92                     | 55.8%                    |
| Activity Scheduling/Structuring                                | 90                     | 54.6%                    |
| Homework Assignment                                            | 86                     | 52.1%                    |
| Core Belief Work                                               | 85                     | 51.5%                    |
| Mindfulness Training                                           | 82                     | 49.7%                    |
| Focusing on Past Experiences' Influence on Current Functioning | 81                     | 49.1%                    |
| Goal-Directed versus Mood-Dependent Behaviors                  | 80                     | 48.5%                    |
| Insight Building                                               | 80                     | 48.5%                    |
| Acceptance Work                                                | 79                     | 47.9%                    |
| Attending to Core Relationships                                | 79                     | 47.9%                    |
| Self-reward/Self-praise/Self-verbalization                     | 77                     | 46.7%                    |
| Physical Exercise                                              | 75                     | 45.5%                    |
| Behavioral Rehearsal/Role Play                                 | 66                     | 40.0%                    |
| Soliciting Client Feedback Regarding Session                   | 66                     | 40.0%                    |
| Social Skills Training                                         | 65                     | 39.4%                    |
| Distancing from Thoughts/Beliefs/Emotions                      | 60                     | 36.4%                    |
| Plan/Practice Alternative Behaviors                            | 58                     | 35.2%                    |
| Guided Imagery/Imagery Rehearsal                               | 55                     | 33.3%                    |
| Behavior Log/Monitoring                                        | 54                     | 32.7%                    |
| Agenda Setting                                                 | 47                     | 28.5%                    |
| Disclosing Theoretical Rationale for Treatment                 | 42                     | 25.5%                    |
| Values Identification                                          | 42                     | 25.5%                    |
| Outcome Monitoring                                             | 40                     | 24.2%                    |
| Exposure/Targeting Avoidance                                   | 38                     | 23.0%                    |
| Communication Analysis                                         | 37                     | 22.4%                    |
| Behavioral Experiments                                         | 36                     | 21.8%                    |
| Behavioral Contracting                                         | 34                     | 20.6%                    |
| Bibliotherapy                                                  | 31                     | 18.8%                    |
| Socratic Dialogue/Guided Discovery                             | 30                     | 18.2%                    |
| Cognitive Defusion                                             | 23                     | 13.9%                    |
| Reward Planning                                                | 23                     | 13.9%                    |

|                                      |    |       |
|--------------------------------------|----|-------|
| Taking an Interpersonal Inventory    | 23 | 13.9% |
| Collaborative Case Conceptualization | 20 | 12.1% |
| Didactic Persuasion                  | 17 | 10.3% |
| Use of Interpersonal Transference    | 12 | 7.3%  |
| Biofeedback                          | 6  | 3.6%  |
| Graded Task Assignment               | 1  | 0.61% |

---

*Note.* Endorsement of practice elements is defined by therapist reported use of these elements at least 75% of the time in their practice. Participants responded to the following question and were provided the list of practice elements: Which practice elements do you use **75% of the time** in your clinical work with **depressed** clients?
